# Supplementary material for: Differential regulation of skin fibroblasts for their TGF-β1-dependent wound healing activities by biomimetic nanofibers
Source: Royal Society of Chemistry journal article supplement (doi:10.1039/c6tb00882h), 2016-01-01
Supplement: c6tb00882h1.pdf [file c6tb00882h1.pdf]

## Supplementary Material

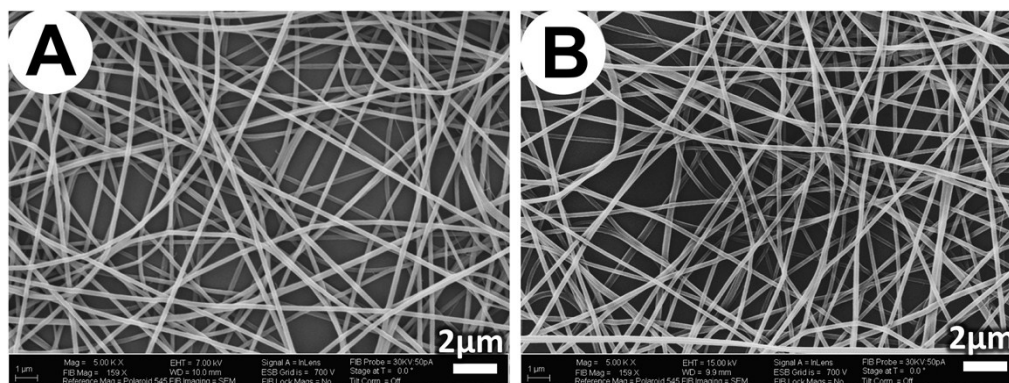

**Figure S1.** Scanning electron microscopic characterization of PCL/Col (A) and PCL/Fib (B) nanofiber matrices. Scale bar = 2  $\mu$ m.

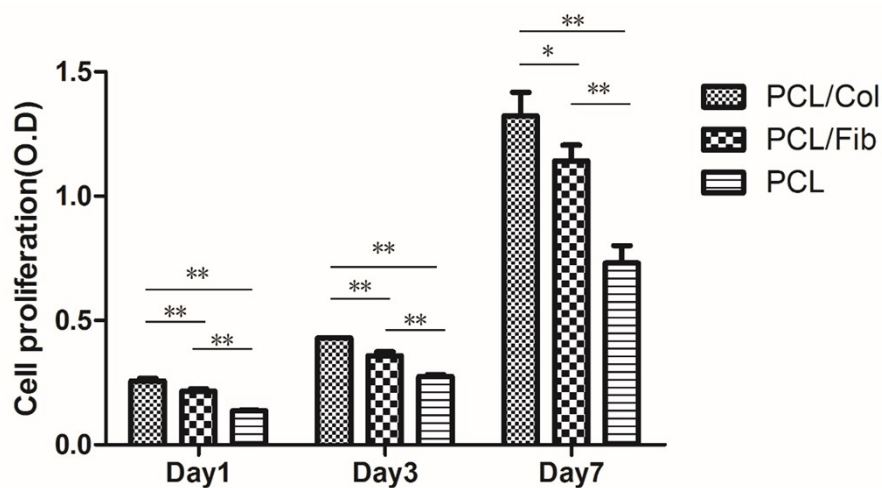

**Figure S2.** Proliferation of human dermal fibroblasts on nanofiber matrices for up to 7 days (n=4) was determined by MTT assay. \* Statistically significant,  $p < 0.05$ .

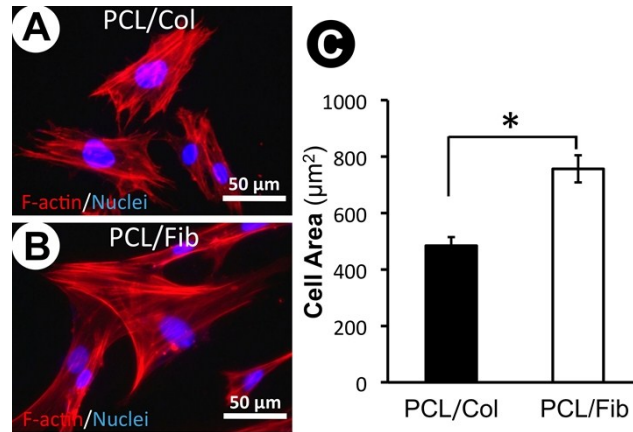

**Figure S3.** The morphology of fibroblasts on PCL/Col (A) and PCL/Fib (B) nanofiber matrices after culture for 24 h. A-B) Fluorescent images of fibroblasts stained with phalloidin-TRITC for intracellular cytoskeleton protein of F-actin (red) and DAPI for nuclei (blue). Scale bar = 50µm. C) Quantification of the average cell spreading area on PCL/Col and PCL/Fib nanofiber matrices. \* Statistically significant,  $p < 0.05$ .

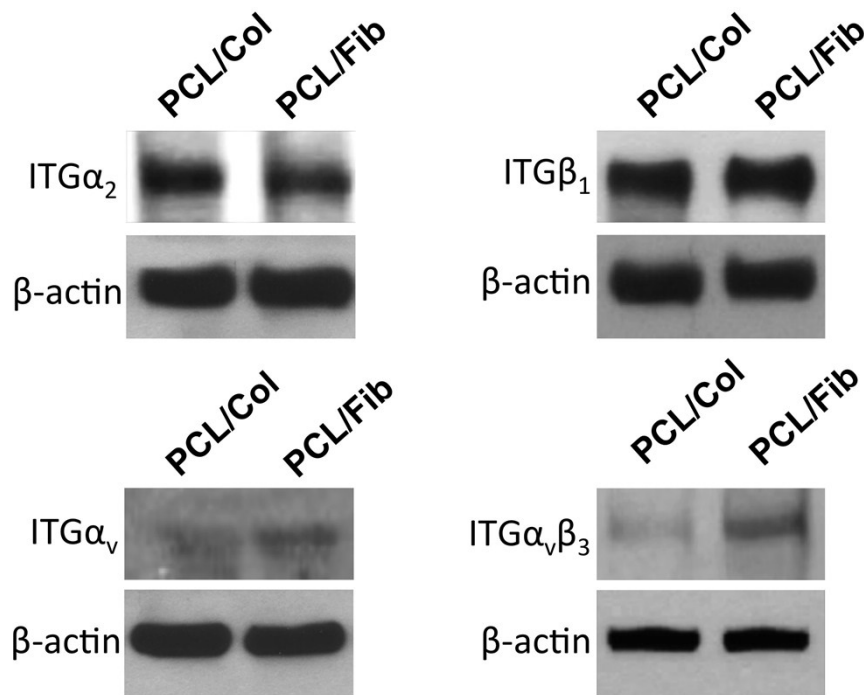

**Figure S4.** Representative immunoblot images in western blotting analysis of integrin  $\alpha_2$ ,  $\beta_1$ ,  $\alpha_v$  and  $\alpha_v\beta_3$  in fibroblasts on PCL/Col and PCL/Fib nanofiber matrices without TGF- $\beta_1$ .

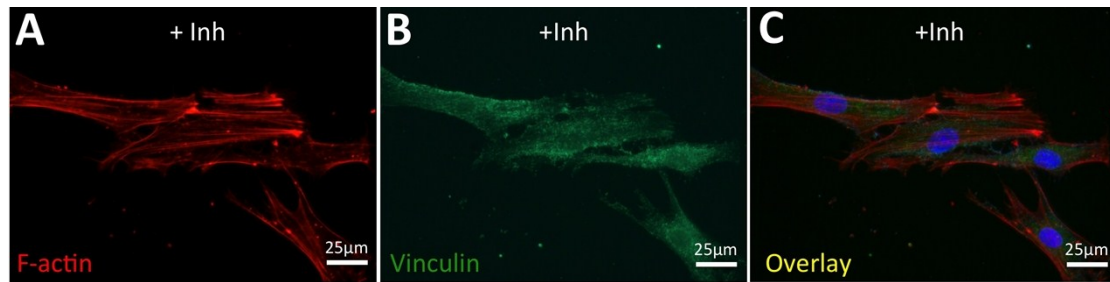

**Figure S5.** Morphology and focal adhesion formation of human dermal fibroblasts on PCL/Fib nanofiber matrices with integrin  $\alpha_v$  inhibitor Cilengitide (10 $\mu\text{g}/\text{mL}$ ). A) Fluorescent staining for F-actin (red) with phalloidin-TRITC. B) Immunofluorescent staining for vinculin (green) with FITC-anti-vinculin antibody. C) Overlay of F-actin and vinculin staining. Cell nuclei stained blue with DAPI.

**Video S1.** Random migration of fibroblasts on PCL/Fib nanofibers cultured either with (A) or without (B) integrin  $\alpha_v$  inhibitor (Inh) Cilengitide (10 $\mu\text{g}/\text{mL}$ ).
